# Supplementary material for: Deep Eutectic Solvents Based on Carboxylic Acids and Glycerol or Propylene Glycol as Green Media for Extraction of Bioactive Substances from Chamaenerion angustifolium (L.) Scop.
Source: MDPI journal article supplement (doi:10.3390/molecules28196978), 2023-10-08
Supplement: s1 [file s1]

**Deep eutectic solvents based on carboxylic acids and glycerol or propylene glycol as green media for extraction of bioactive substances from *Chamanerion angustifolium* (L.) Scop.**

**Alena Koigerova <sup>1</sup>, Alevtina Gosteva <sup>2</sup>, Artemiy Samarov <sup>3</sup>, and Nikita Tsvetov <sup>1,2, \*</sup>**

<sup>1</sup> Federal Research Centre “Kola Science Centre of the Russian Academy of Sciences”, Laboratory of medical and biological technologies, Fersmana str. 14, Apatity, Russia; [a.koygerova@ksc.ru](mailto:a.koygerova@ksc.ru)

<sup>2</sup> I.V. Tananaev Institute of Chemistry and Technology of Rare Elements and Mineral Raw Materials - Subdivision of the Federal Research Centre «Kola Science Centre of the Russian Academy of Sciences», Akademgorodok 26a, Apatity, Russia; [tsvet.nik@mail.ru](mailto:tsvet.nik@mail.ru); [angosteva@list.ru](mailto:angosteva@list.ru)

<sup>3</sup> Saint Petersburg State University, Institute of Chemistry, Department of Chemical Thermodynamics and Kinetics, Universitetskiy prosp. 26, St. Petersburg, Russia, [samarov@yandex.ru](mailto:samarov@yandex.ru)

\* Correspondence: [tsvet.nik@mail.ru](mailto:tsvet.nik@mail.ru)

Supplementary materials

**S1.** Experimental values of density and dynamic viscosity of suited DESs with 10 molar part of water at 30°C.

|       | <i>Density</i> | <i>Dyn. Viscosity</i> | <i>Variation Coefficient</i> | <i>Fw/Bw Deviation</i> |
|-------|----------------|-----------------------|------------------------------|------------------------|
| MAGL  | 1.16288        | 3.460                 | 0.02                         | 0.18                   |
| MAPG  | 1.10282        | 4.671                 | 0.01                         | 0.11                   |
| MalGL | 1.20588        | 9.506                 | 0.03                         | 0.09                   |
| MalPG | 1.13224        | 7.446                 | 0.05                         | 0.15                   |
| CAGL  | 1.23641        | 25.839                | 0.01                         | 0.23                   |
| CAPG  | 1.13597        | 15.782                | 0.00                         | 0.26                   |

S2. Kinetical curves and linearization for TPC. 1-2 – MAGL, 3-4 – MAPG, 5-6 – MalGL, 7-8 – MalPG, 9-10 – CAGL, 11-12 – CAPG.

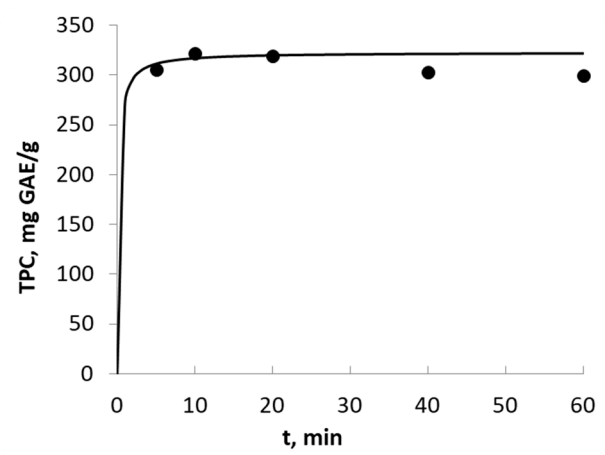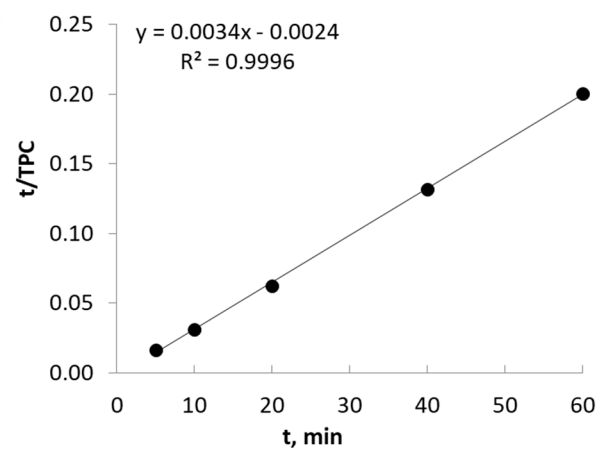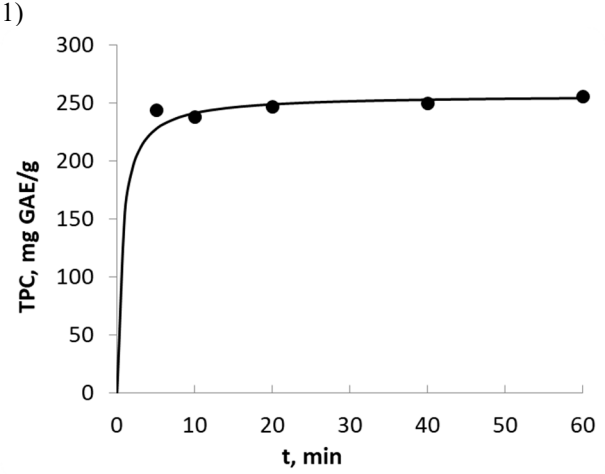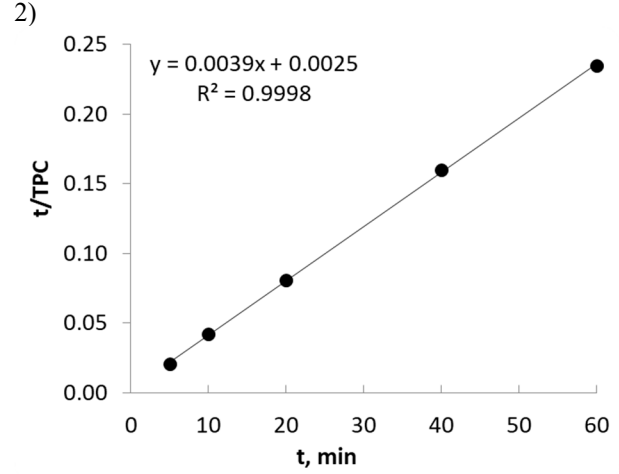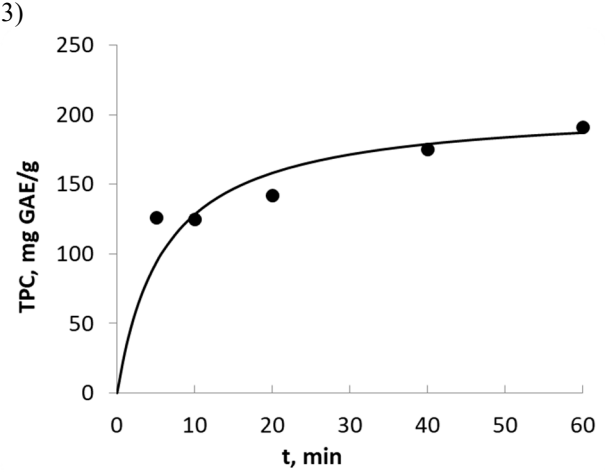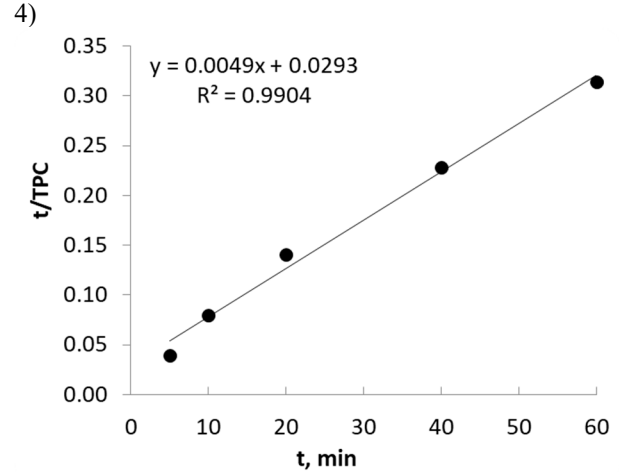

5)

6)

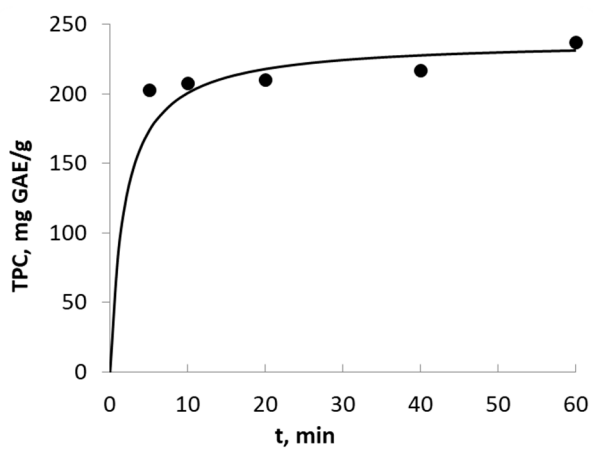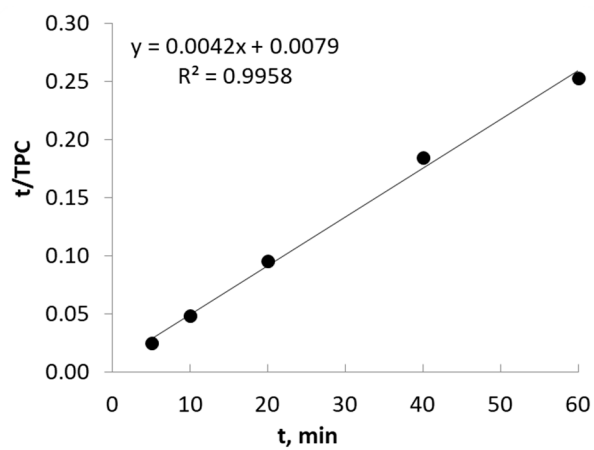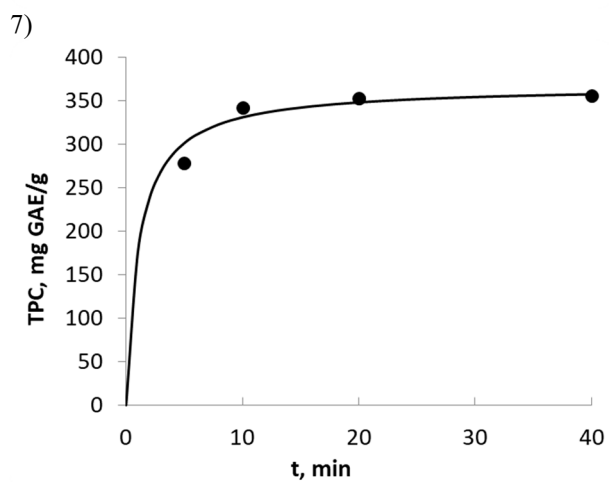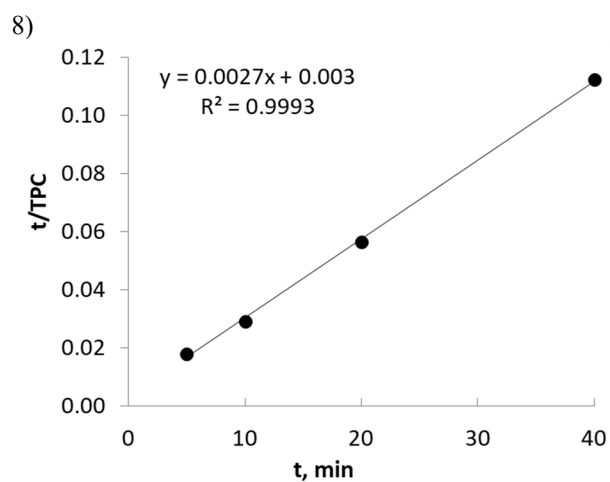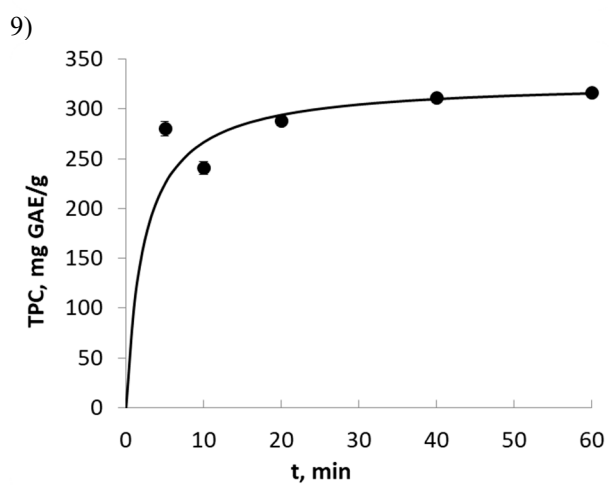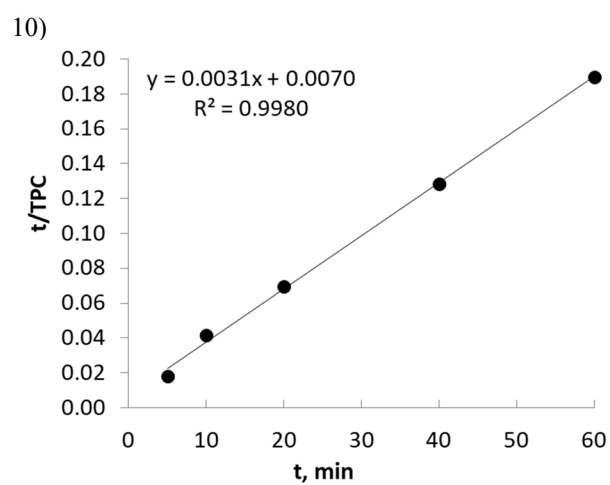

11)

12)

**S3.** Kinetical curves and linearization for TFC. 1-2 – MAGL, 3-4 – MAPG, 5-6 – MalGL, 7-8 – MalPG, 9-10 – CAGL, 11-12 – CAPG.

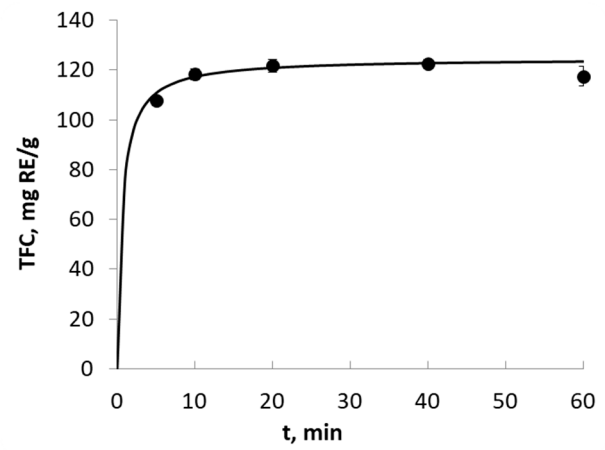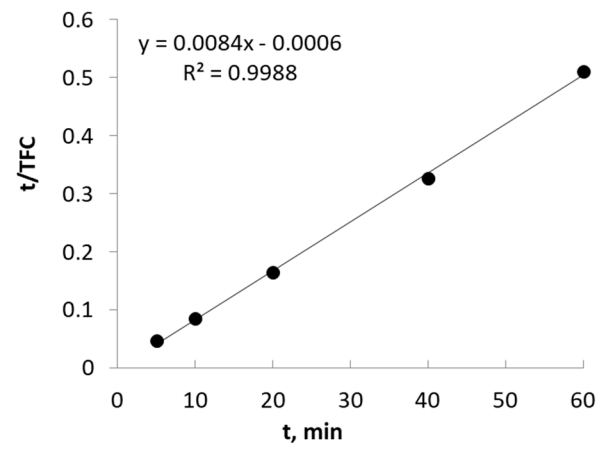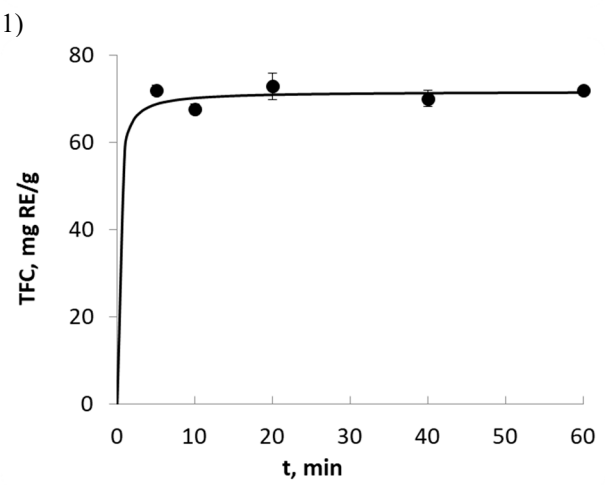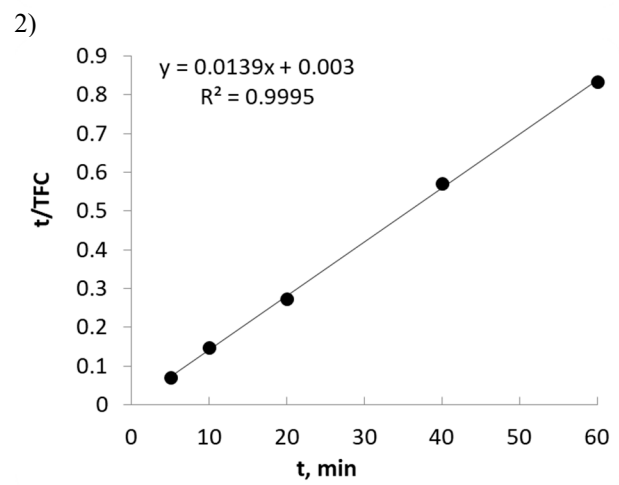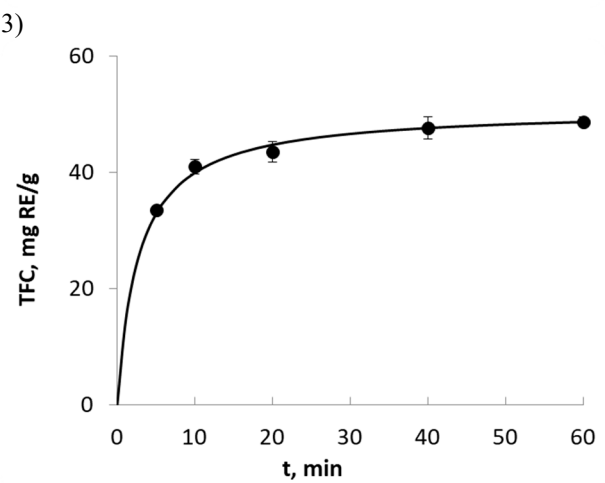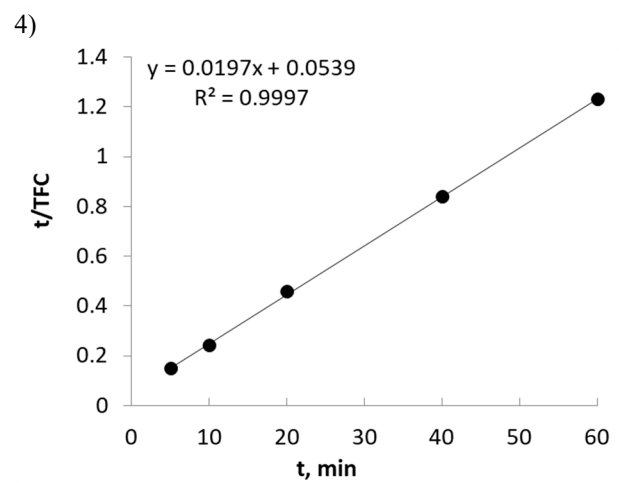

5)

6)

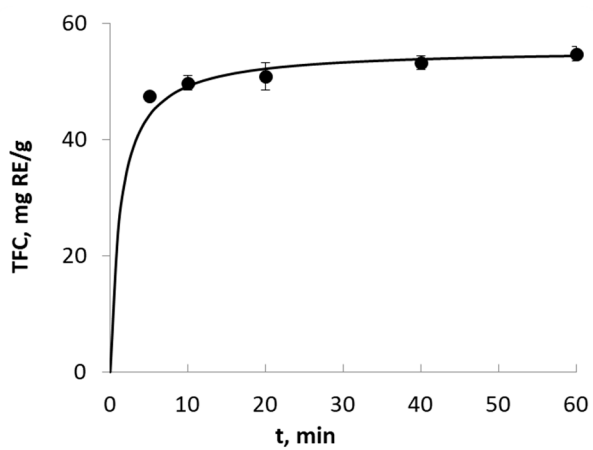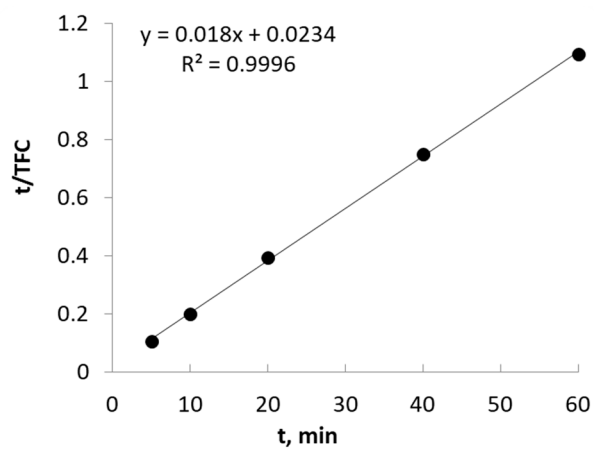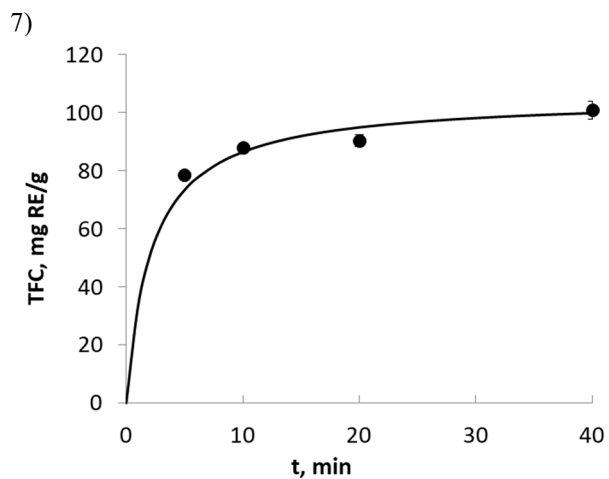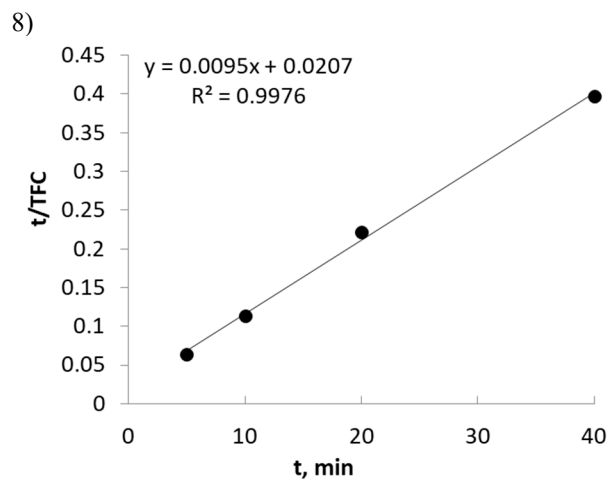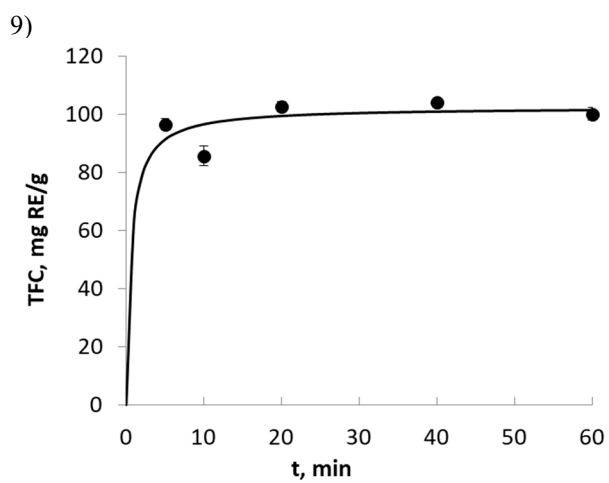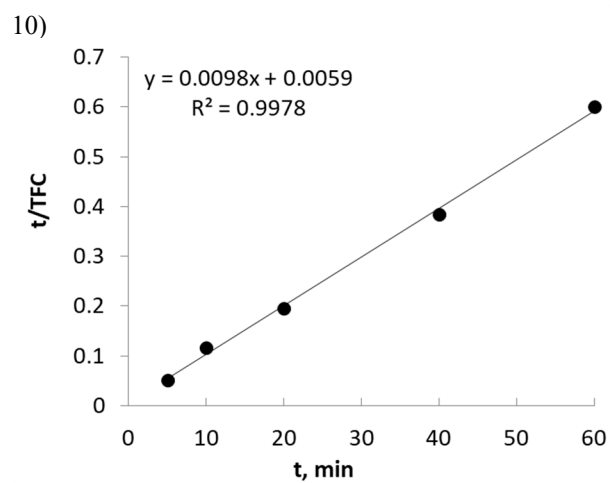

11)

12)

**S4.** Calculated equilibrium yields ( $Y^{eq}$ ) and rate constants ( $k$ ) for TPC and TFC.

| DES   | TPC, mg GAE/g |                 | TFC, mg RE/g |                 |
|-------|---------------|-----------------|--------------|-----------------|
|       | $Y^{eq}$      | $k \times 10^3$ | $Y^{eq}$     | $k \times 10^3$ |
| MAGL  | 322.7         | 17.0            | 124.7        | 12.7            |
| MAPG  | 257.0         | 6.0             | 71.7         | 65.6            |
| MalGL | 205.9         | 0.8             | 50.9         | 7.2             |
| MalPG | 238.4         | 2.2             | 55.6         | 13.8            |
| CAGL  | 367.3         | 2.5             | 105.2        | 4.4             |
| CAPG  | 327.7         | 1.3             | 102.5        | 16.0            |

S5. Kinetical curves and linearization for TAC. 1-2 – MAGL, 3-4 – MAPG, 5-6 – MalGL, 7-8 –MalPG, 9-10 – CAGL, 11-12 – CAPG.

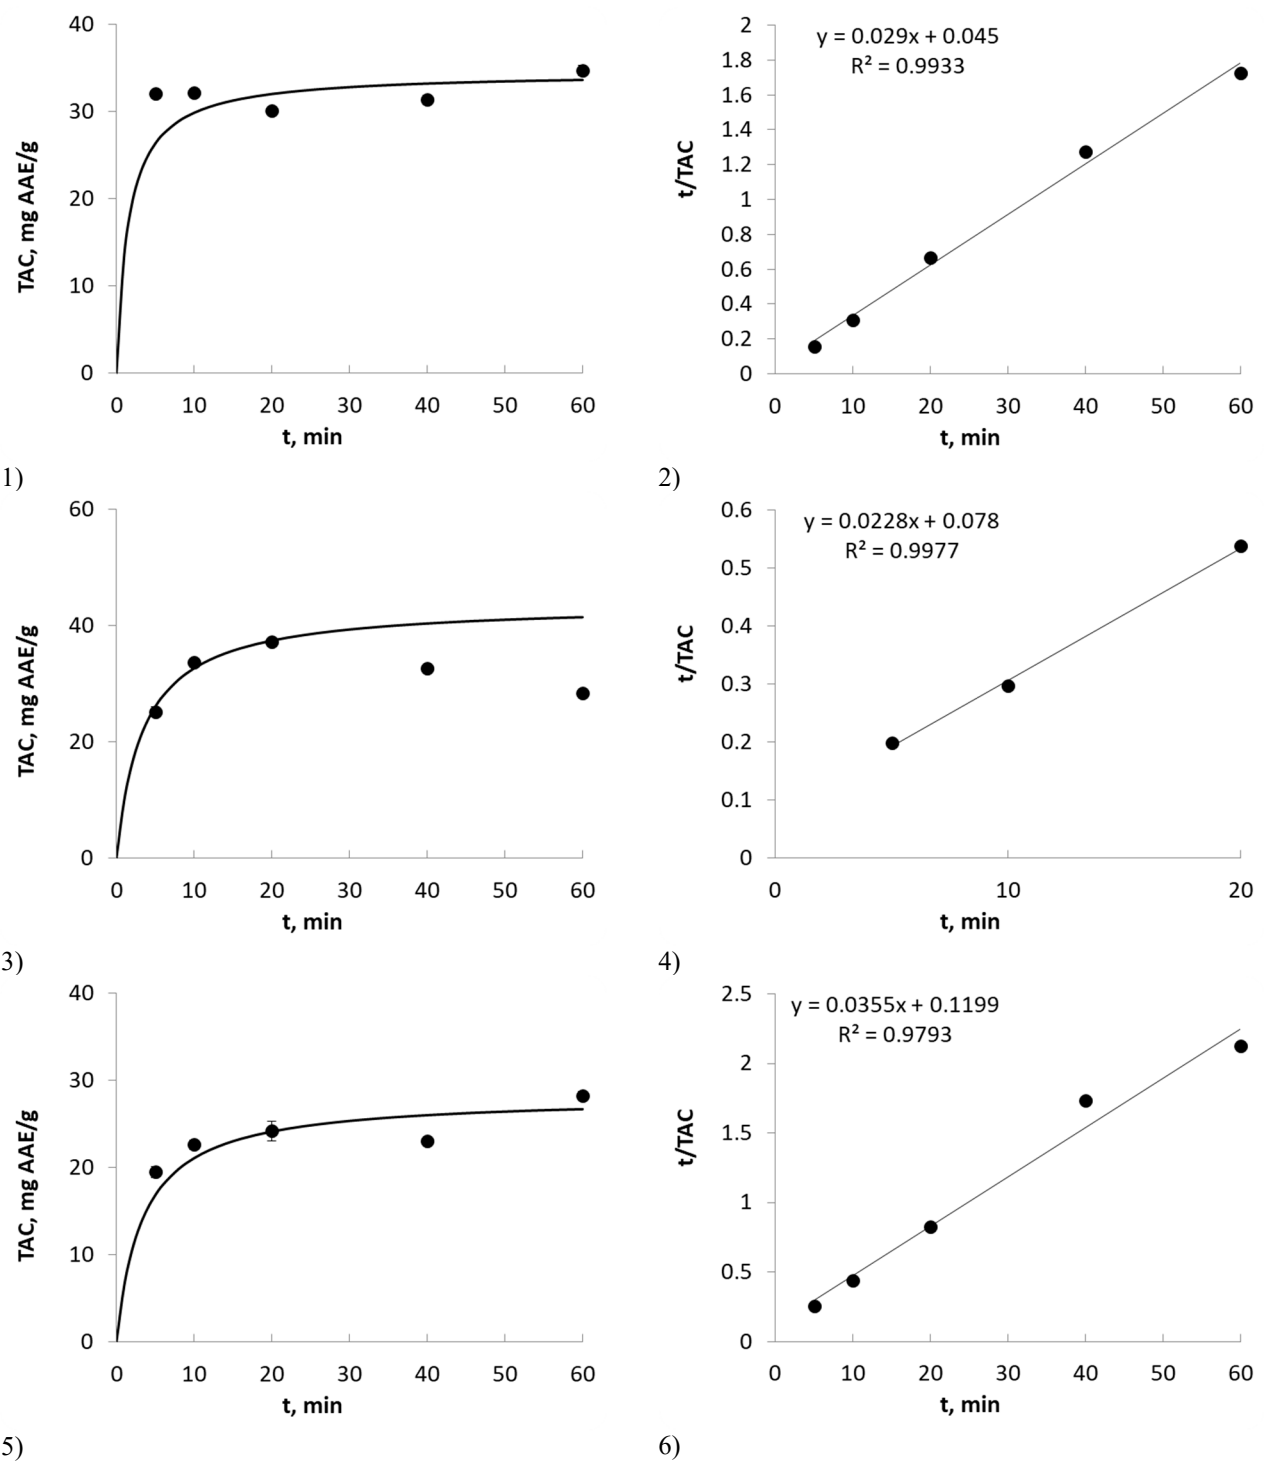

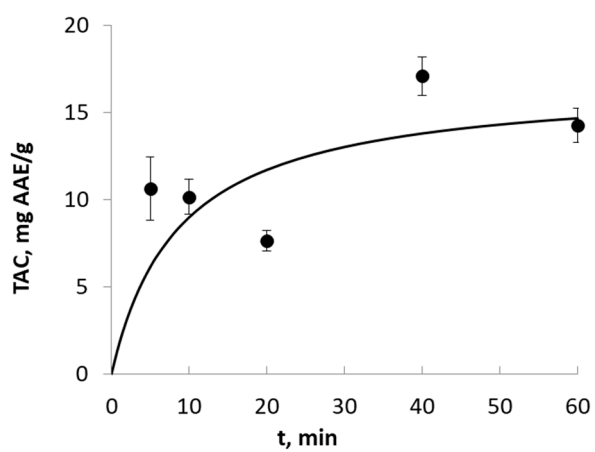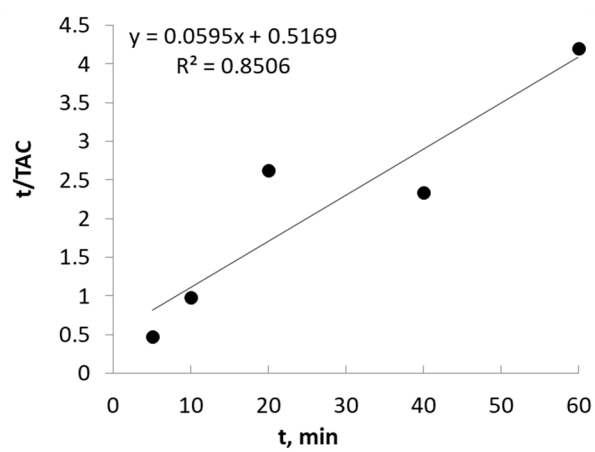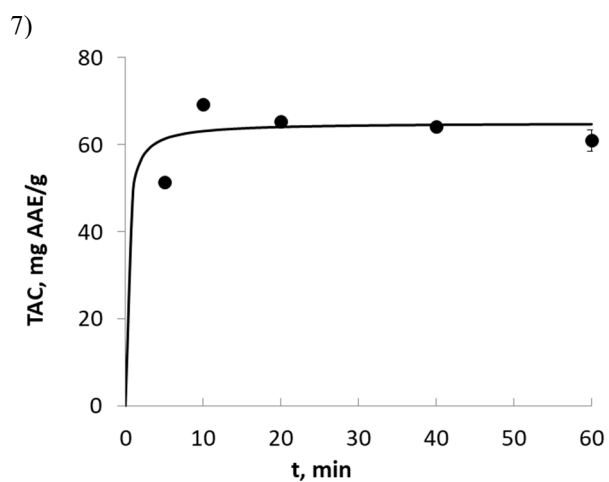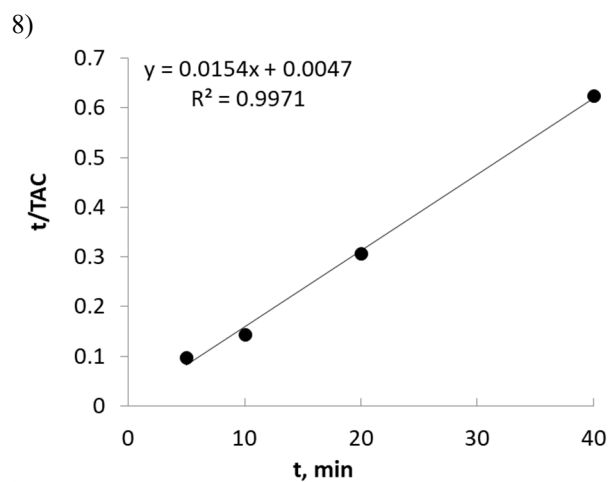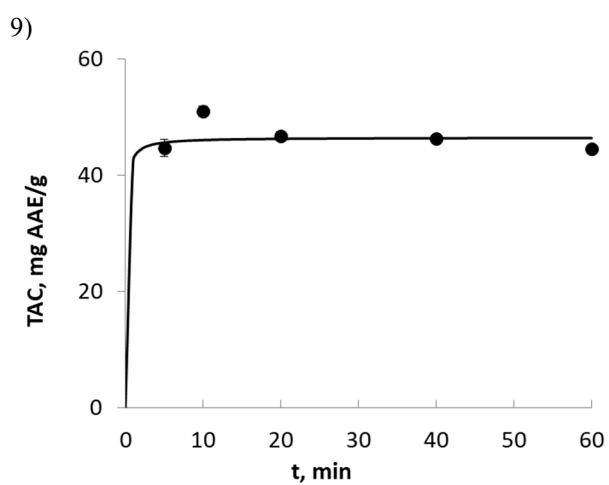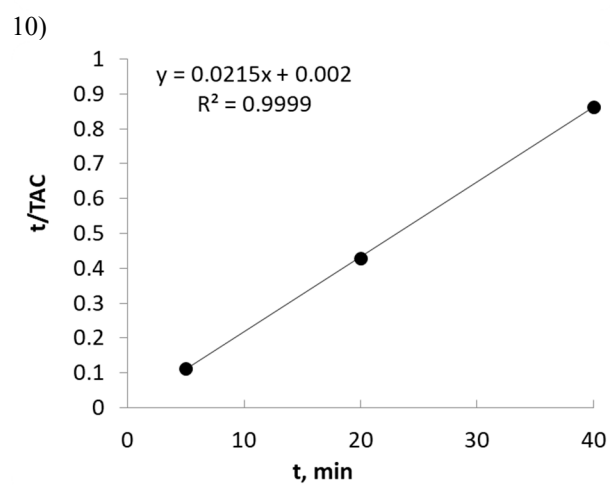

11)

12)



**S6.** Kinetical curves and linearization for DPPH. 1-2 – MAGL, 3-4 – MAPG, 5-6 – MalGL, 7-8 –MalPG, 9-10 – CAGL, 11-12 – CAPG.

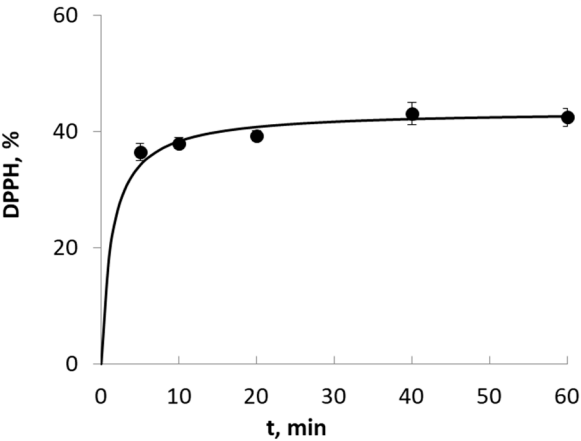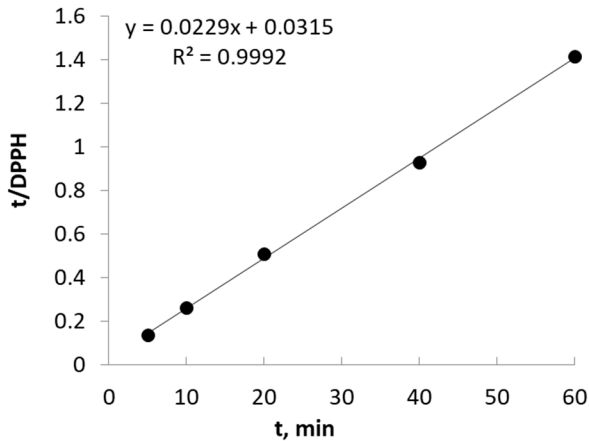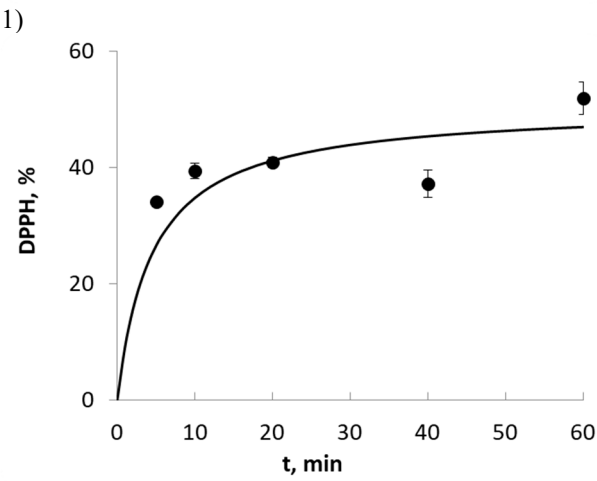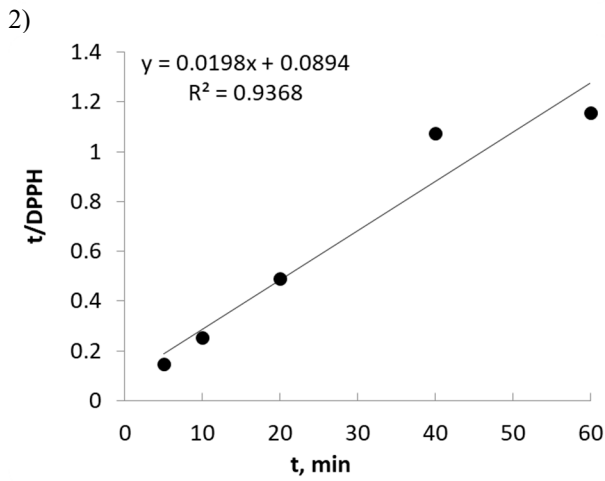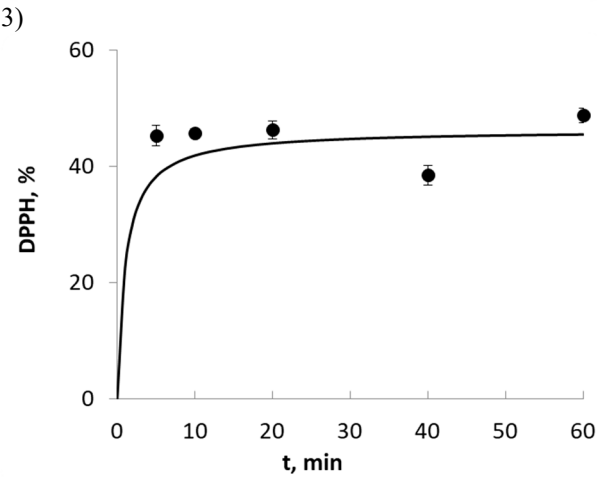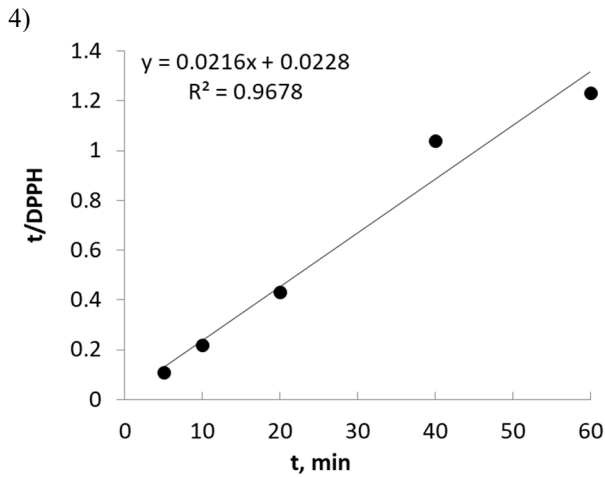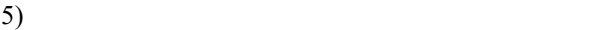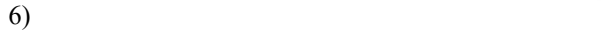

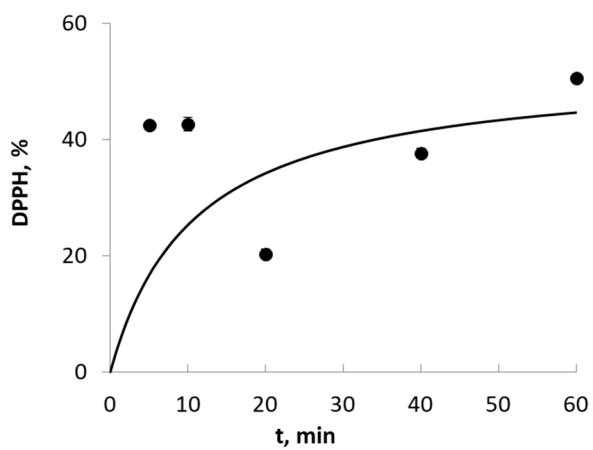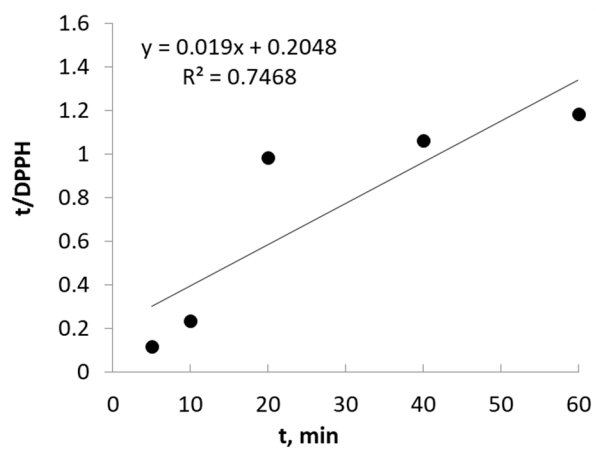

7)

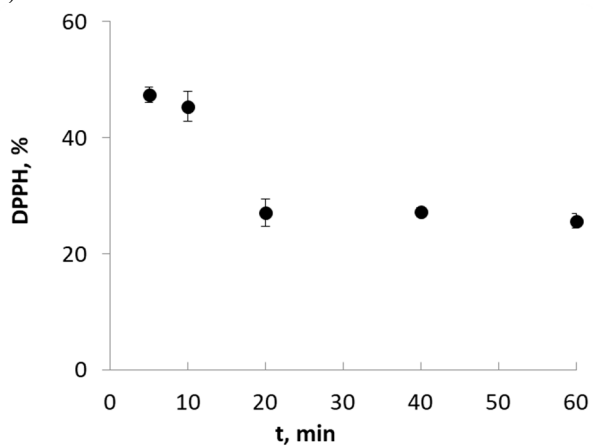

8)

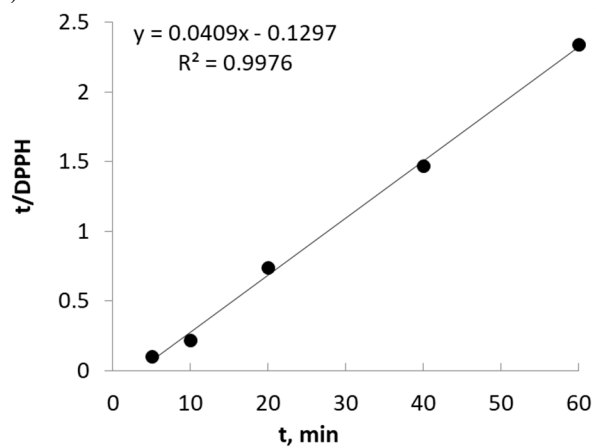

9)

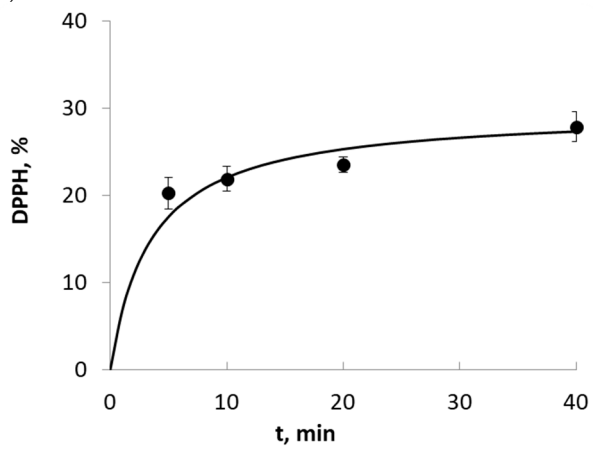

10)

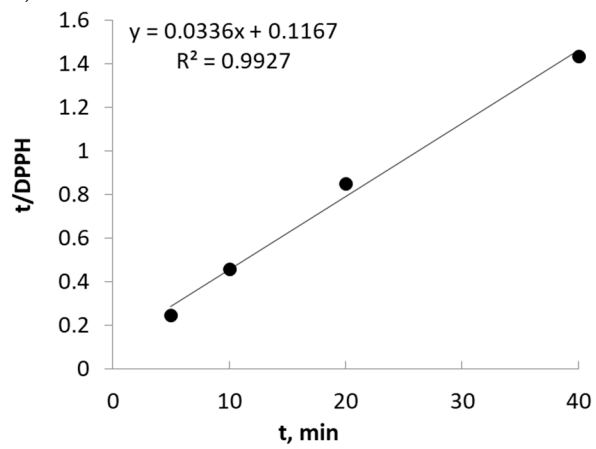

11)

12)

**S7.** Calculated equilibrium yields ( $Y^{eq}$ ) and rate constants ( $k$ ) for TAC and DPPH.

| DES   | TAC, mg AAE/g |                 | DPPH, %  |                 |
|-------|---------------|-----------------|----------|-----------------|
|       | $Y^{eq}$      | $k \times 10^3$ | $Y^{eq}$ | $k \times 10^3$ |
| MAGL  | 34.5          | 18.7            | 43.6     | 16.7            |
| MAPG  | 43.8          | 6.7             | 50.5     | 4.4             |
| MalGL | 28.2          | 10.5            | 46.3     | 20.4            |
| MalPG | 16.8          | 6.9             | 52.7     | 1.8             |
| CAGL  | 65.0          | 50.5            | 25.0     | -13.6           |
| CAPG  | 46.5          | 233.3           | 29.7     | 9.7             |

**S8.** Kinetical curves and linearization for myricetin. 1-2 – MAGL, 3-4 – MAPG, 5-6 – MalGL, 7-8 –MalPG, 9-10 – CAGL, 11-12 – CAPG.

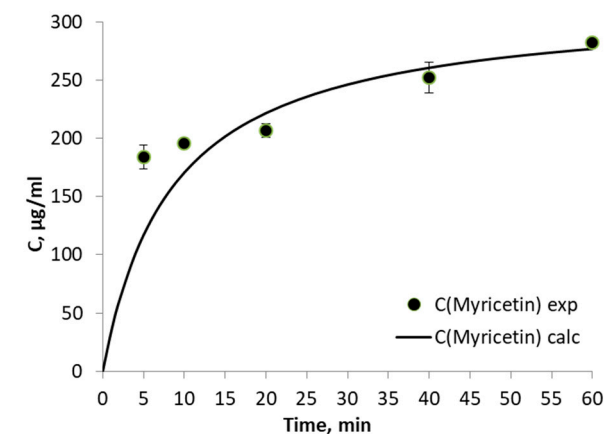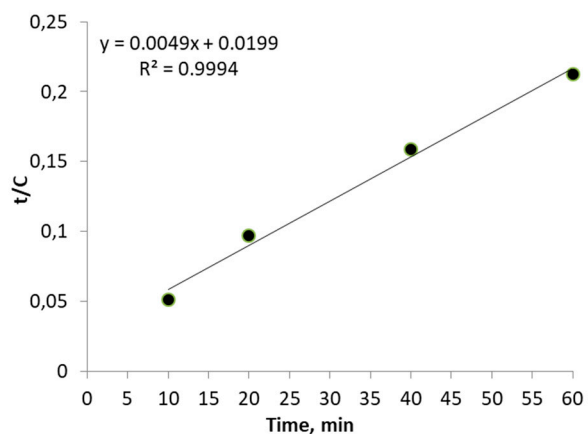

1)

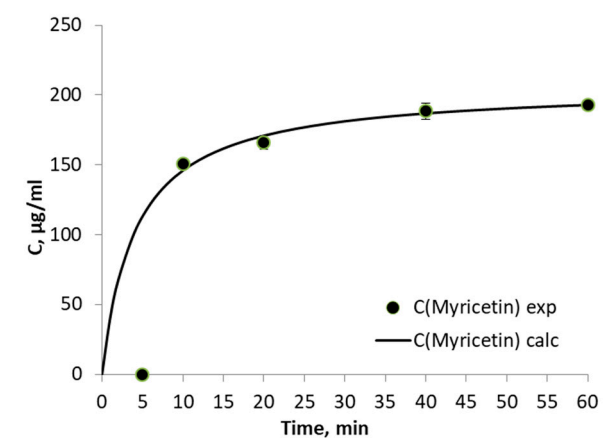

2)

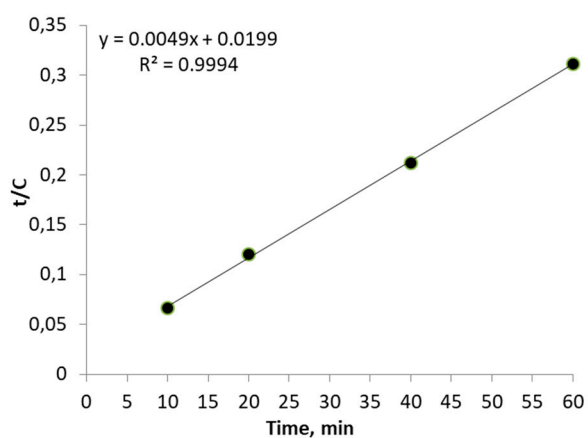

3)

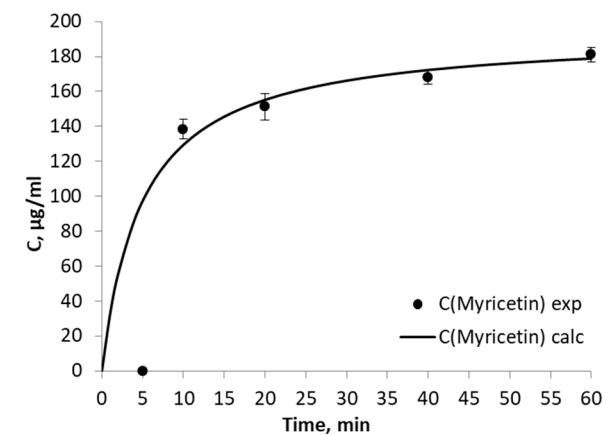

4)

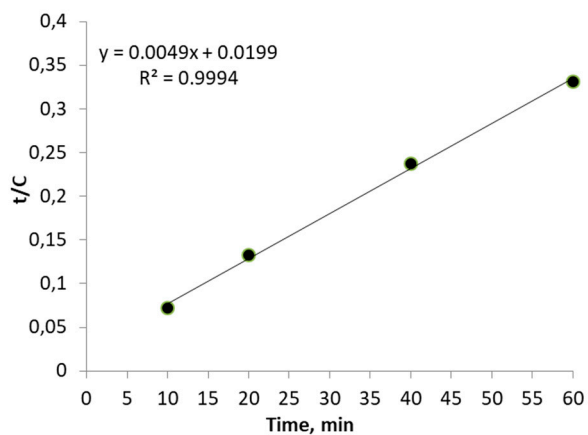

5)

6)

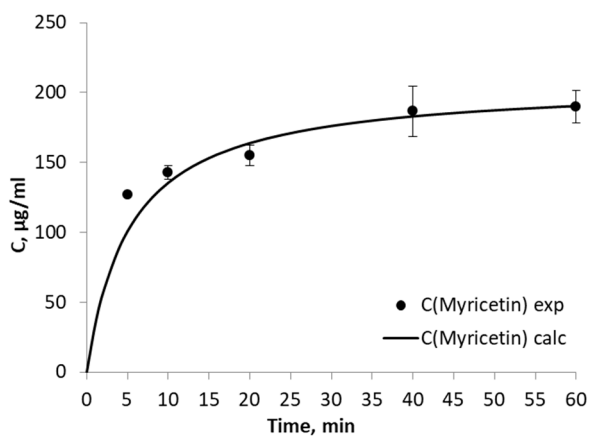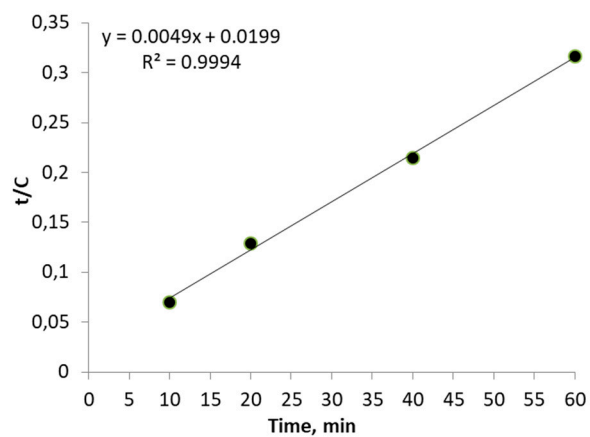

7)

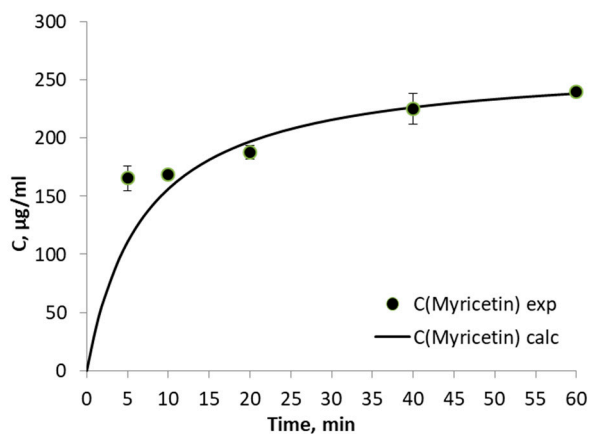

8)

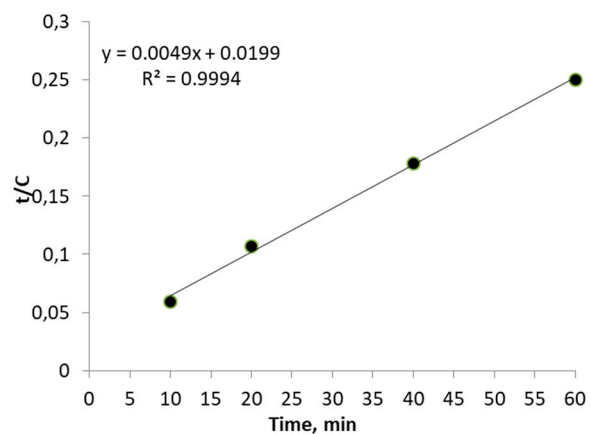

9)

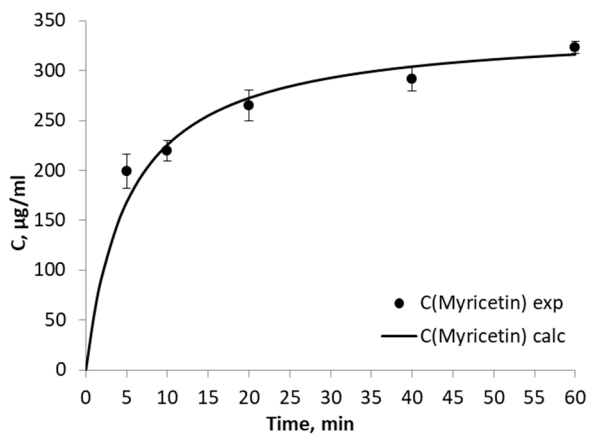

10)

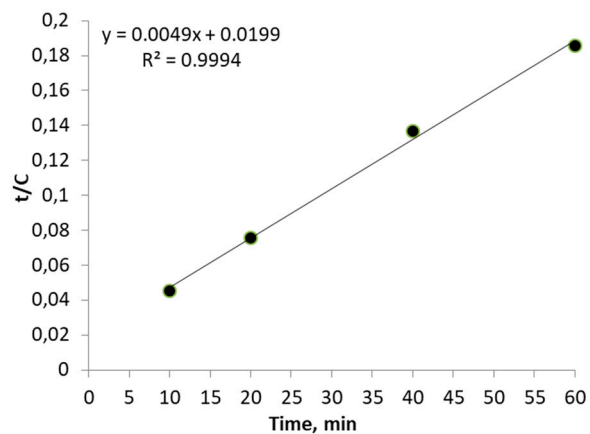

11)

12)

**S9.** Kinetical curves and linearization for quercetin. 1-2 – MAGL, 3-4 – MAPG, 5-6 – MalGL, 7-8 –MalPG, 9-10 – CAGL, 11-12 – CAPG.

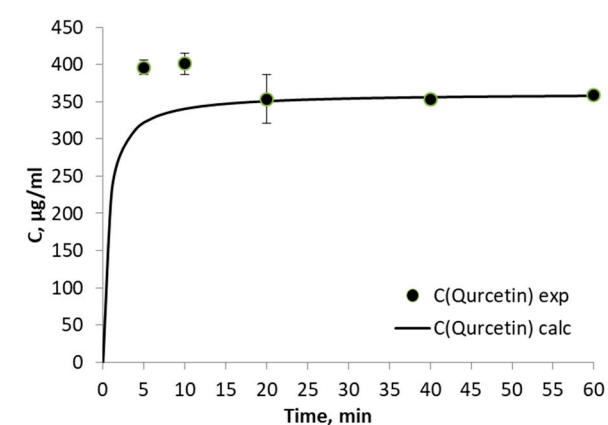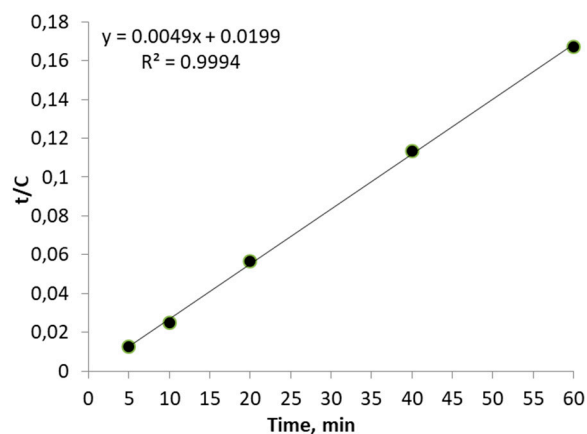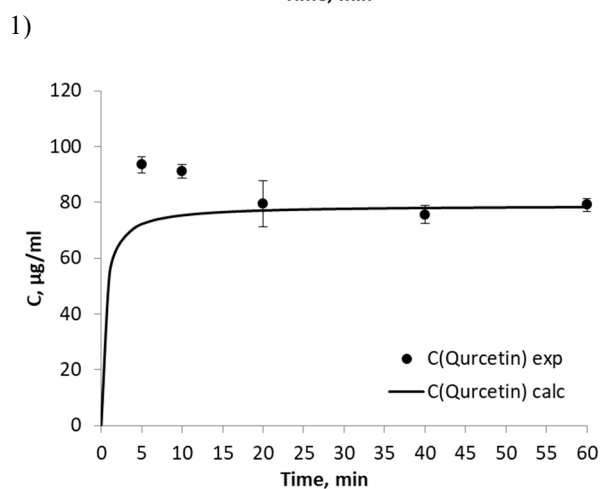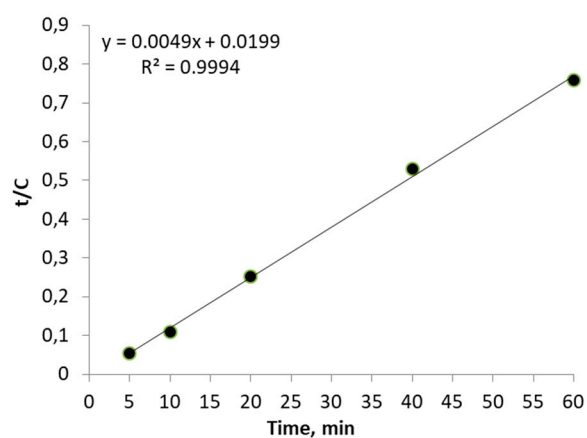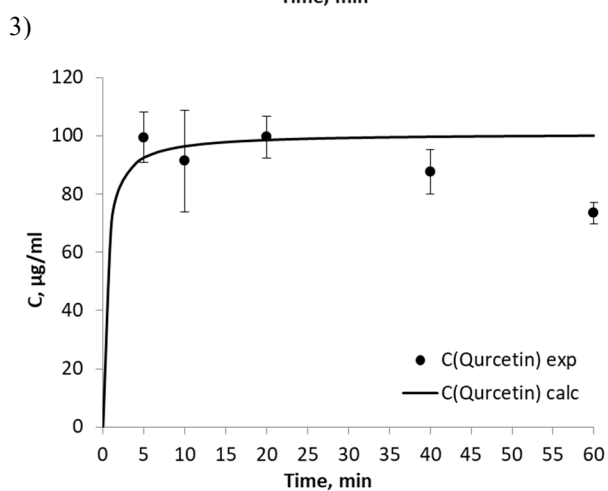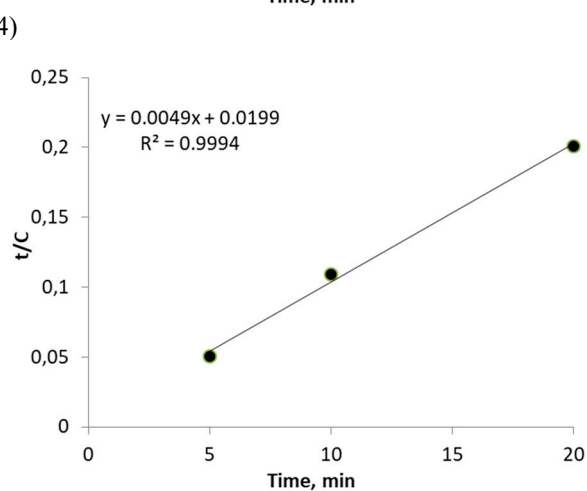

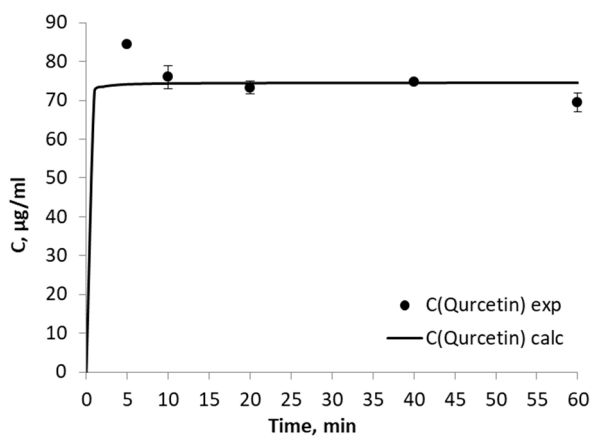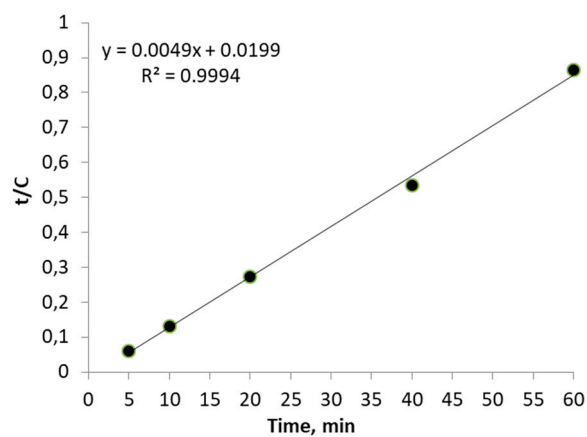

7)

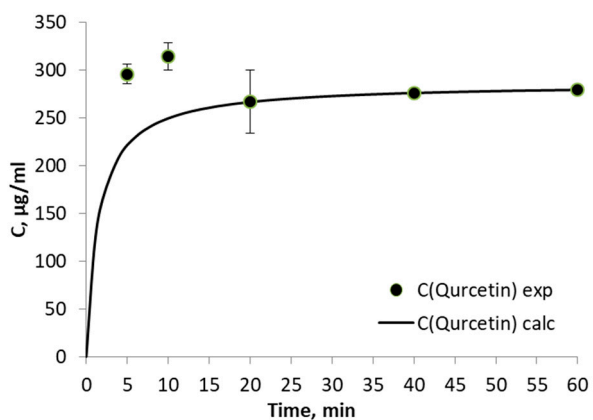

8)

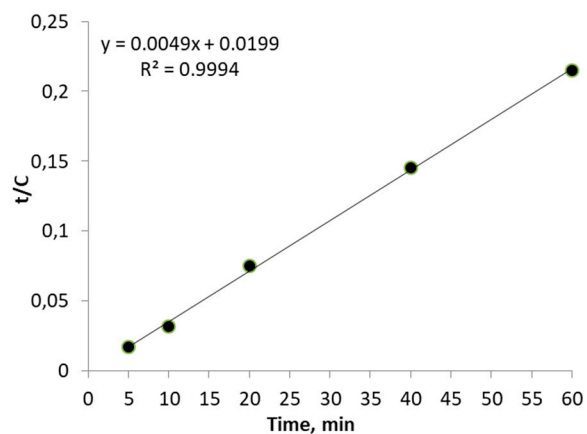

9)

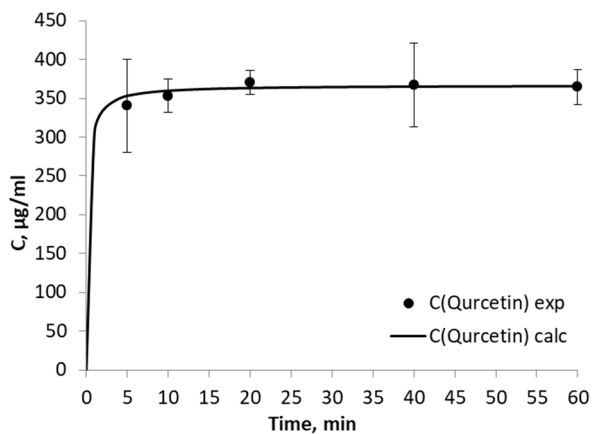

10)

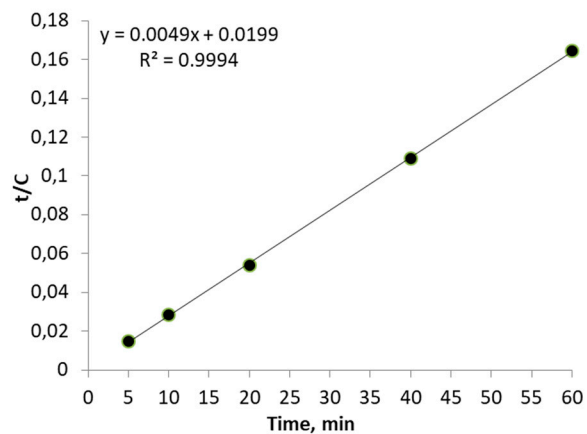

11)

12)

**S10.** Kinetical curves and linearization for kaempferol. 1-2 – MAGL, 3-4 – MAPG, 5-6 – MalGL, 7-8 –MalPG, 9-10 – CAGL, 11-12 – CAPG.

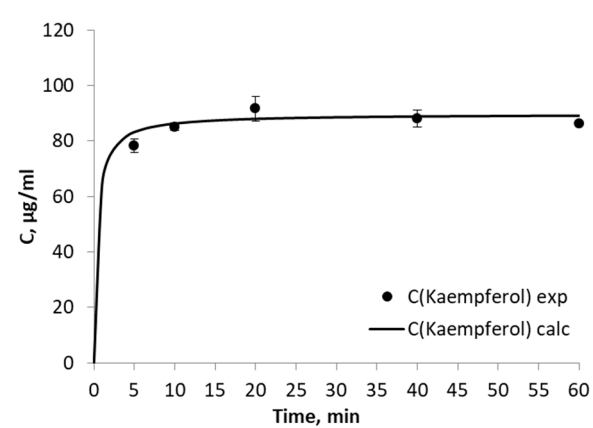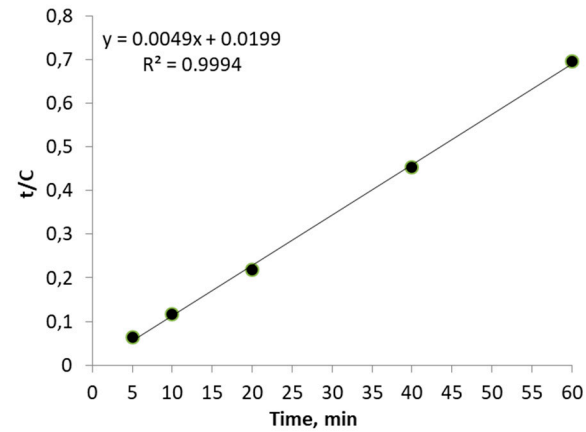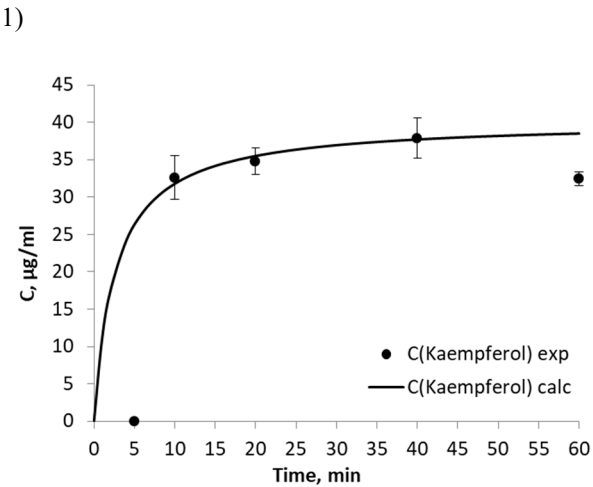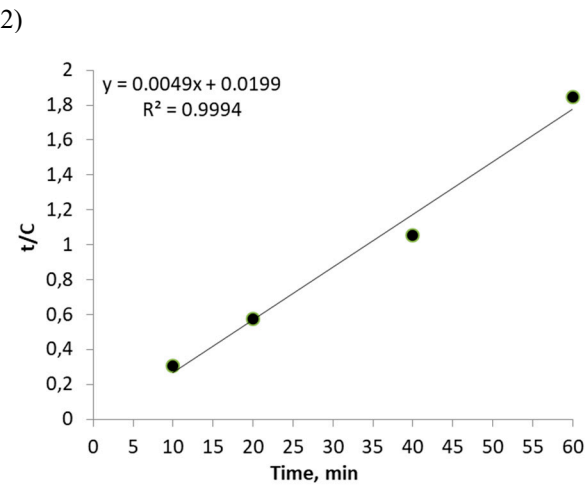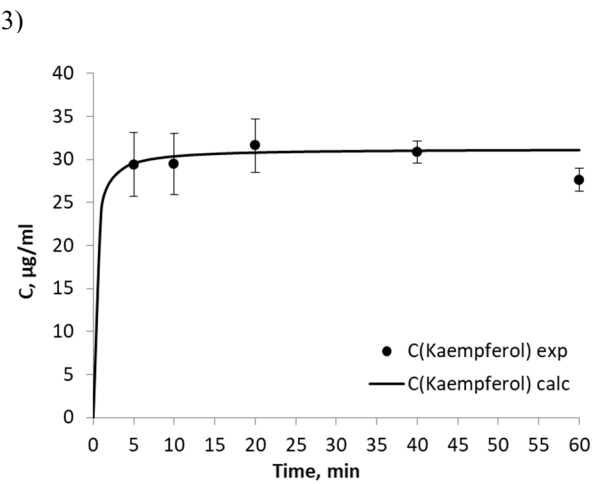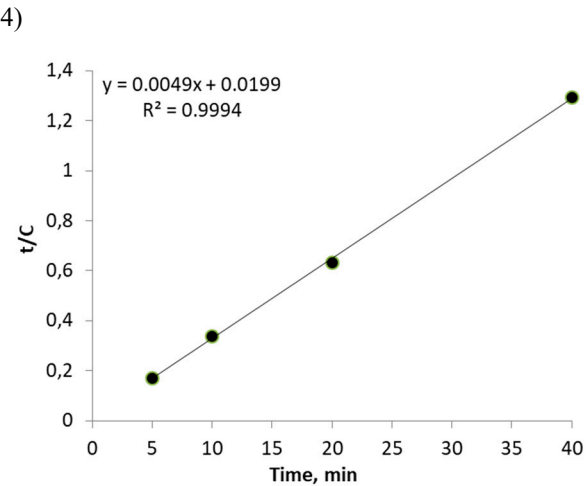



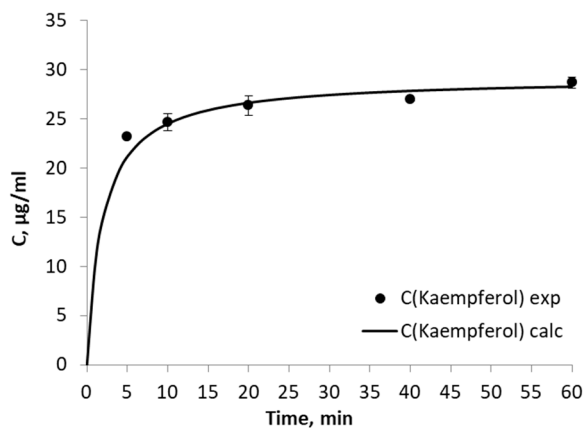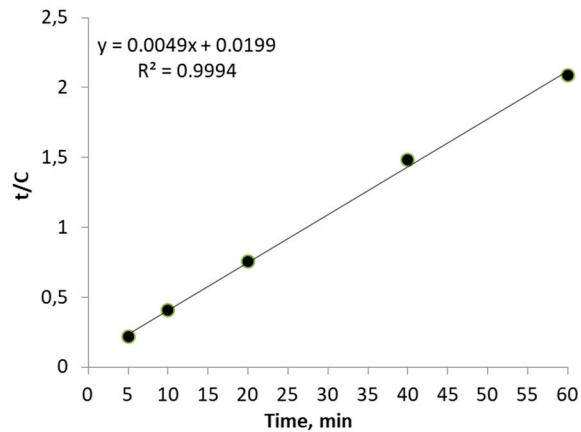

7)

8)

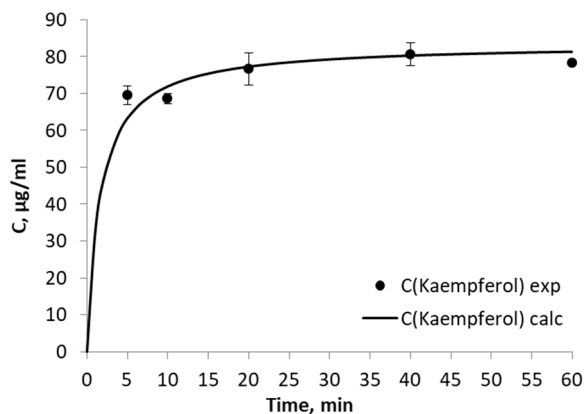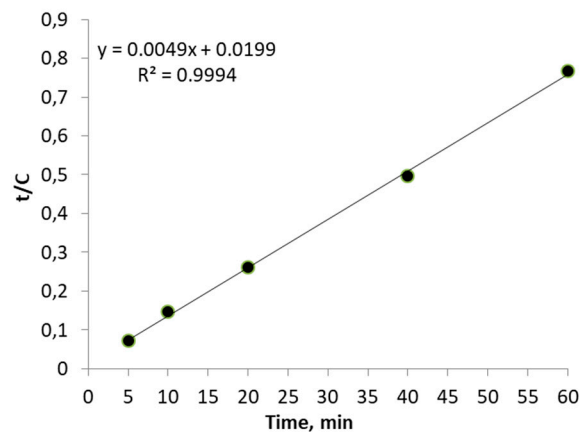

9)

10)

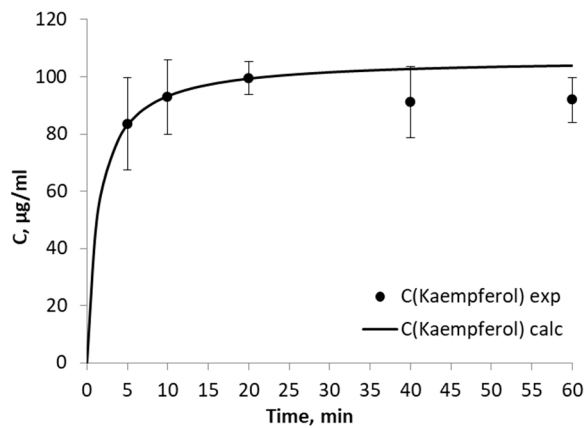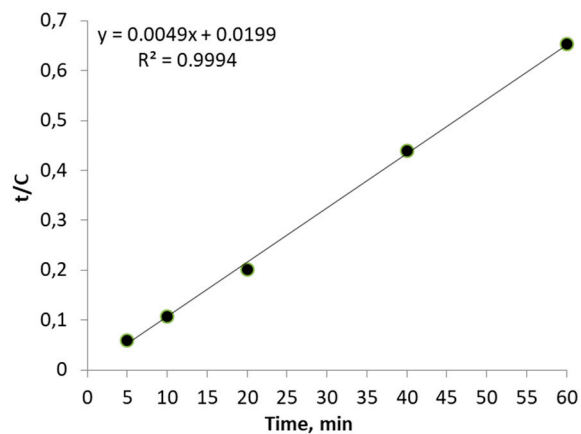

11)

12)

**S11.** Calculated equilibrium yields ( $Y^{eq}$ ) and rate constants ( $k$ ) for describing of the experimental data on the kinetics of myricetin, quercetin , and kaempferol glycosides extraction.

| DES   | c(myricetin) |                 | c(quercetin) |                 | c(kaempferol) |                 |
|-------|--------------|-----------------|--------------|-----------------|---------------|-----------------|
|       | $Y^{eq}$     | $k \times 10^3$ | $Y^{eq}$     | $k \times 10^3$ | $Y^{eq}$      | $k \times 10^3$ |
| MAGL  | 316.0        | 0.4             | 361.7        | 4.4             | 89.7          | 28.3            |
| MAPG  | 206.1        | 1.2             | 78.9         | 27.0            | 40.2          | 9.4             |
| MalGL | 193.6        | 1.0             | 100.8        | 21.9            | 31.3          | 111.1           |
| MalPG | 207.2        | 0.9             | 74.6         | 464.9           | 29.2          | 18.0            |
| CAGL  | 266.0        | 0.5             | 285.9        | 2.4             | 83.5          | 7.5             |
| CAPG  | 343.7        | 0.6             | 366.9        | 13.9            | 106.4         | 6.7             |
